# Supplementary material for: Hydrogen-bonded effects on supramolecular blue phase liquid crystal dimeric complexes
Source: Royal Society of Chemistry journal article supplement (doi:10.1039/c5ra06868a), 2015-01-01
Supplement: c5ra06868a1.pdf [file c5ra06868a1.pdf]

## Supporting Information

### Hydrogen-bonded effects on supramolecular blue phase liquid crystal dimeric complexes

Chong-Lun Wei,<sup>†</sup> Te-Cheng Chen,<sup>†</sup> Putikam Raghunath,<sup>‡</sup> Ming-Chang Lin<sup>‡</sup> and Hong-Cheu Lin<sup>\*,†</sup>

<sup>†</sup>Department of Materials Science and Engineering, National Chiao Tung University, Hsinchu, Taiwan

<sup>‡</sup>Center for Interdisciplinary Molecular Science, Department of Applied Chemistry, National Chiao Tung University, Hsinchu, Taiwan

---

#### Table of Contents:

|                                   |     |
|-----------------------------------|-----|
| 1. Preparation of materials ..... | S2  |
| 2. Scheme S1 .....                | S2  |
| 3. Scheme S2 .....                | S5  |
| 4. Scheme S3 .....                | S10 |
| 5. Figure S1 .....                | S12 |
| 6. Figure S2 .....                | S13 |
| 7. Figure S3 .....                | S14 |
| 8. Figure S4.....                 | S15 |
| 9. Figure S5.....                 | S16 |
| 10. Table S1 .....                | S17 |
| 11. Table S2 .....                | S17 |
| 12. Table S3 .....                | S17 |
| 13. Table S4 .....                | S18 |
| 14. Table S5 .....                | S19 |

## Preparation of materials.

### Scheme S1

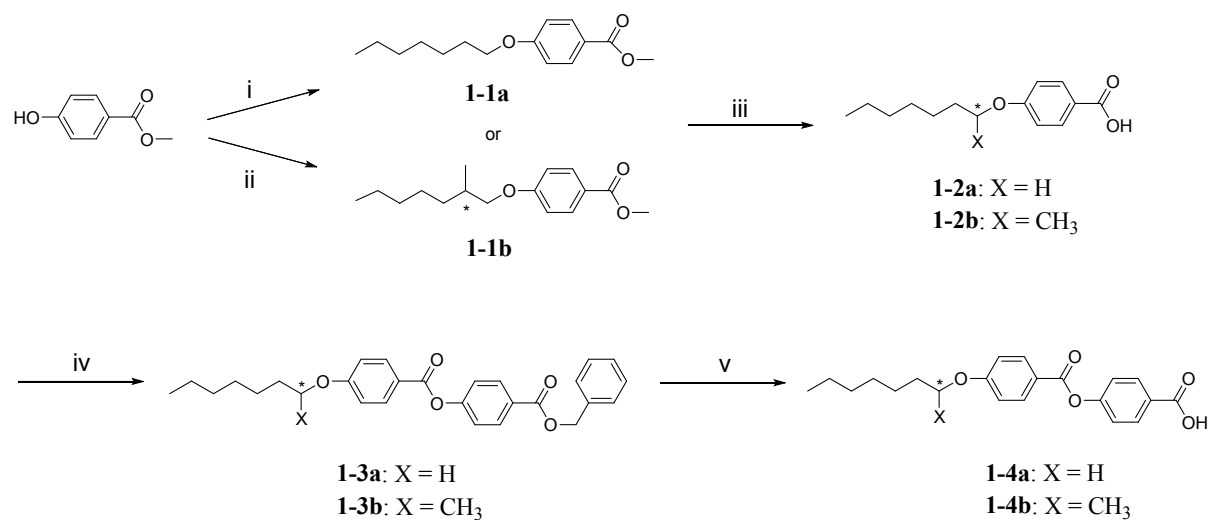

Reagents and conditions: (i) 1-bromoheptane, K<sub>2</sub>CO<sub>3</sub>, KI, acetone, reflux, 24 h; (ii) (S)-(+)-2-octanol, DIAD, PPh<sub>3</sub>, THF, 0 °C, 15 min, then r.t., overnight; (iii) KOH, MeOH, reflux, overnight, then HCl aqueous; (iv) benzyl 4-hydroxybenzoate, DCC, DMAP, DCM, r.t., overnight; (v) H<sub>2</sub>, 10% Pd-C, THF, r.t., 10 h.

### Synthesis of methyl 4-(heptyloxy)benzoate (1-1a)

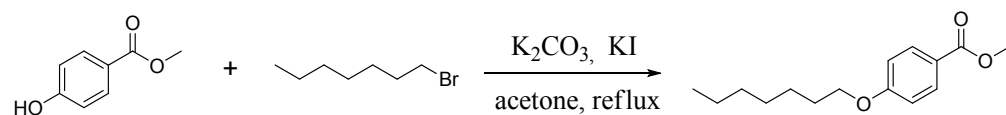

A mixture of methyl 4-hydroxybenzoate (5.0 g, 32.9 mmol), 1-bromoheptane (7.07 g, 39.5 mmol), K<sub>2</sub>CO<sub>3</sub> (6.82 g, 49.4 mmol), and potassium iodide (0.05 g) in dry acetone (200 mL) was stirred and refluxed under nitrogen temperature for 24 h. After cooling to room temperature, the solvent was removed under reduced pressure, and the residue was taken up in water and extracted with ethyl acetate. Then, the organic layer was dried over Na<sub>2</sub>SO<sub>4</sub>, filtrated and concentrated under reduced pressure. The crude product was purified by silica gel chromatography (*n*-hexane/ethyl acetate = 40:1 v/v) to afford compound **1-1a** as a white solid in 93% yield.

<sup>1</sup>H NMR (300 MHz, CDCl<sub>3</sub>): δ (ppm) 7.95 (d, *J* = 8.4 Hz, 2H), 6.87 (d, *J* = 8.4 Hz, 2H), 3.98 (t, *J* = 6.3 Hz, 2H), 3.86 (s, 3H), 1.77-1.24 (m, 10H), 0.86 (t, *J* = 6.3Hz, 3H).

### Synthesis of 4-(heptyloxy)benzoic acid (1-2a)

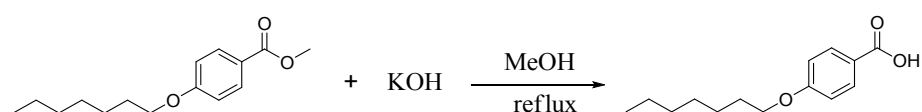

To a stirred solution of **1-1a** (3.68 g, 15.6 mmol) in ethanol (80 mL), an aqueous solution 10 mL of potassium hydroxide (2.5 g, 44.7 mmol) was added dropwise and heated to reflux overnight. After cooling to room temperature, the solvent was removed under reduced pressure, and acidified with 6 N HCl. The precipitated product was collected by filtration and recrystallization from ethanol/H<sub>2</sub>O (3:1 v/v) to afford compound **1-2a** as a white solid in 95% yield.

<sup>1</sup>H NMR (300 MHz, DMSO-*d*<sub>6</sub>): δ (ppm) 7.85 (d, *J* = 8.4 Hz, 2H), 6.98 (d, *J* = 8.4 Hz, 2H), 4.01 (t, *J* = 6.3 Hz, 2H), 1.74-1.66 (m, 10H), 0.84 (t, *J* = 6.3 Hz, 3H).

#### Synthesis of benzyl 4-((4-(heptyloxy)benzoyloxy)benzoate (**1-3a**))

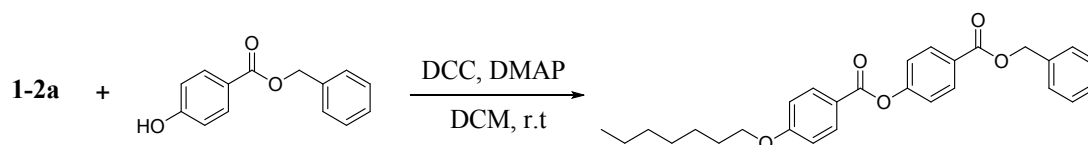

To a stirred solution of **1-2a** (3.0 g, 12.7 mmol), benzyl 4-hydroxybenzoate (2.42 g, 10.6 mmol) and 4-(*N,N*-dimethylamino)pyridine (DMAP) (0.13 g, 1.06 mmol) in dry dichloromethane (100 mL), *N,N*-dicyclohexylcarbodiimide (DCC) (2.79 g, 13.8 mmol) was added and the reaction mixture stirred at room temperature overnight under nitrogen. The resulting precipitate of dicyclohexylurea (DCU) was filtered off and washed with an excess of dichloromethane (20 mL). The solvent was evaporated and the crude product was purified by silica gel chromatography (*n*-hexane/dichloromethane = 1:1 v/v) to afford compound **1-3** as a white solid in 85% yield.

<sup>1</sup>H NMR (300 MHz, CDCl<sub>3</sub>): δ (ppm) 8.05 (m, 4H), 7.41 (m, 5H), 7.27 (m, 2H), 6.94 (d, *J* = 8.4 Hz, 2H), 5.36 (s, 2H), 4.10 (t, *J* = 6.3 Hz, 2H), 1.70-1.61 (m, 2H), 1.41-1.25 (m, 8H), 0.86 (t, *J* = 6.3 Hz, 3H).

#### Synthesis of 4-(4-(heptyloxy)benzoyloxy)benzoic acid (**1-4a**)

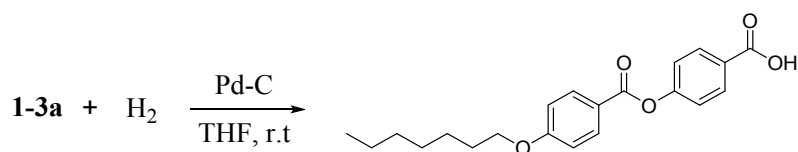

To a stirred solution of **1-3a** (2.1 g, 4.5 mmol) in tetrahydrofuran (THF) (80 mL) was added palladium carbon (Pd/C) (0.3 g, 10 wt%). The reaction mixture was stirred at room temperature under hydrogen atmosphere over 10 h. The Pd/C was removed by filtration through Celite and washed with THF. The solvent was evaporated and the crude product recrystallized from ethanol to give compound **1-4a** as a white solid in 95% yield.

<sup>1</sup>H NMR (300 MHz, CDCl<sub>3</sub>): δ (ppm) 8.05 (m, 4H), 7.35 (d, *J* = 8.4 Hz, 2H), 6.90 (d, *J* = 8.4 Hz, 2H), 4.05 (t, *J* = 6.3 Hz, 2H), 1.70-1.61 (m, 2H), 1.41-1.25 (m, 8H), 0.86 (t, *J* = 6.3 Hz, 3H). Anal. calcd for C<sub>21</sub>H<sub>24</sub>O<sub>5</sub>: C, 70.77, H, 6.79; found: C, 70.97, H, 6.70 %.

### Synthesis of methyl 4-{{(1*R*)-1-methylheptyl}oxy}benzoate (1-1b)

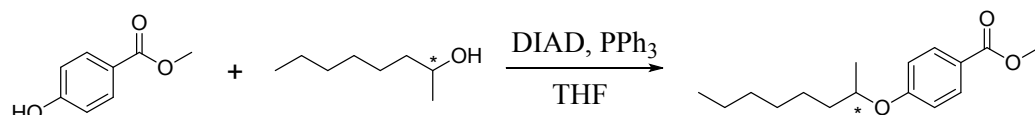

To a solution of methyl 4-hydroxybenzoate (4.0 g, 26.2 mmol), (S)-(+)-2-octanol (3.0 g, 23.0 mmol), and triphenylphosphine (PPh<sub>3</sub>) (10.0 g, 38.1 mmol) in dry dichloromethane (20 mL) at 0 °C under nitrogen for 15 min was added dropwise with diisopropyl azodicarboxylate (DIAD) (8.0 g, 39.5 mmol) in dry dichloromethane (10 mL). After the mixture was warmed to room temperature and stirred overnight. The resulting mixture was quenched by water, extracted with dichloromethane, and then dried over Na<sub>2</sub>SO<sub>4</sub> and evaporated. The crude product was purified by silica gel chromatography (*n*-hexane/ethyl acetate = 40:1 v/v) to afford compound **2-1** as a colorless oil in 75% yield.

<sup>1</sup>H NMR (300 MHz, CDCl<sub>3</sub>): δ (ppm) 7.97 (d, *J* = 8.4 Hz, 2H), 6.87 (d, *J* = 8.4 Hz, 2H), 4.42 (m, 1H) 3.88 (s, 3H), 1.71-1.57 (m, 2H), 1.42-1.25 (m, 11H), 0.88 (t, *J* = 6.3 Hz, 3H).

### Synthesis of 4-{{(1*R*)-1-methylheptyl}oxy}benzoic acid (1-2b)

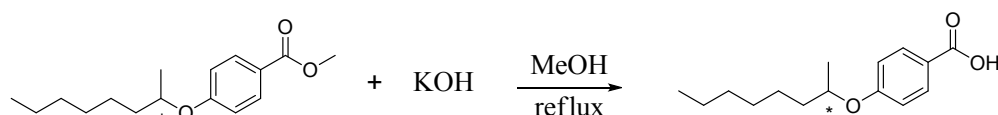

The similar manner was followed as that described above for the preparation of **1-2a**. Compound **1-2b** was obtained as a white solid in 95% yield.

<sup>1</sup>H NMR (300 MHz, CDCl<sub>3</sub>): δ (ppm) 8.04 (d, *J* = 8.4Hz, 2H), 6.92 (d, *J* = 8.4 Hz, 2H), 4.47 (t, 1H), 1.71-1.57 (m, 2H), 1.42-1.25 (m, 11H), 0.88 (t, *J* = 6.3 Hz, 3H).

### Synthesis of benzyl 4-((4-((1*R*)-1-methylheptyloxy)benzoyl)oxy)benzoate (1-3b)

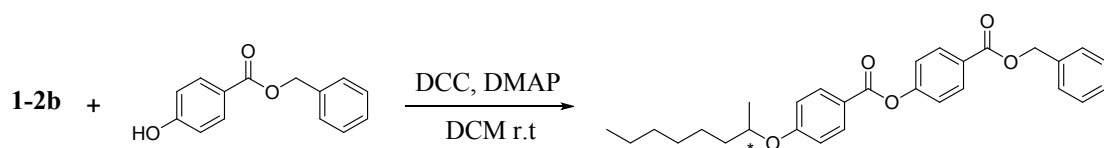

The similar manner was followed as that described above for the preparation of **1-3a**. Compound **1-3b** was obtained as a white solid in 85% yield.

<sup>1</sup>H NMR (300 MHz, CDCl<sub>3</sub>): δ (ppm) 8.14 (m, 4H), 7.44-7.32 (m, 5H), 7.27-7.25 (m, 2H), 6.94 (m, 2H), 5.35 (s, 2H), 4.45 (m, 1H), 1.71-1.59 (m, 2H), 1.42-1.25 (m, 11H), 0.88 (t, *J* = 6.3 Hz, 3H).

### Synthesis of 4-((4-((1*R*)-1-methylheptyloxy)benzoyl)oxy)benzoic acid (**1-4b**)

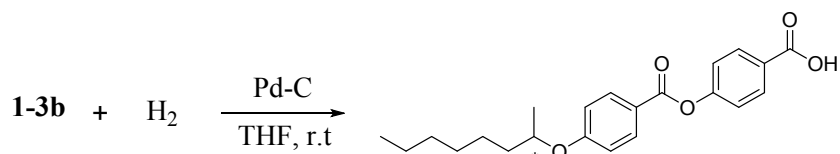

The similar manner was followed as that described above for the preparation of **1-4a**. Compound **1-4b** was obtained as a white solid in 94% yield.

<sup>1</sup>H NMR (300 MHz, CDCl<sub>3</sub>): δ (ppm) 8.13 (m, 4H), 7.32 (d, *J* = 8.4 Hz, 2H), 6.92 (d, *J* = 8.4 Hz, 2H), 4.46 (m, 1H), 1.75-1.60 (m, 2H), 1.43-1.27 (m, 11H), 0.86 (t, *J* = 6.3 Hz, 3H). Anal. calcd for C<sub>22</sub>H<sub>26</sub>O<sub>5</sub>: C, 71.33, H, 7.07; found: C, 71.35, H, 7.00 %.

### Scheme S2

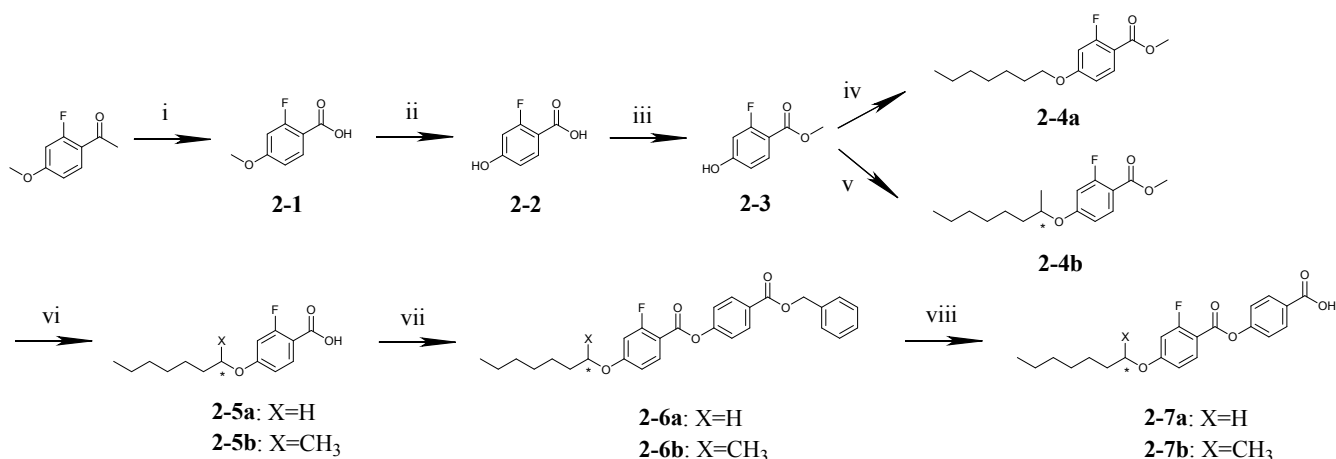

Reagent and condition: (i) Br<sub>2</sub>, NaOH, 1,4-Dioxane, 0 °C; (ii) BBr<sub>3</sub>, DCM, r.t; (iii) Toluene, H<sub>2</sub>SO<sub>4</sub>, MeOH, 80 °C; (iv) 1-bromoheptane, K<sub>2</sub>CO<sub>3</sub>, KI, acetone, reflux, 24 h; (v) (S)-(+)-2-octanol, PPh<sub>3</sub>, DIAD, THF, 0 °C, 15 min, then r.t., overnight; (vi) KOH, MeOH, Reflux; (vii) DCC, DMAP, DCM, r.t; (viii) H<sub>2</sub>, Pd/C, THF, r.t.

### Synthesis of 2-fluoro-4-methoxybenzoic acid, **2-1**

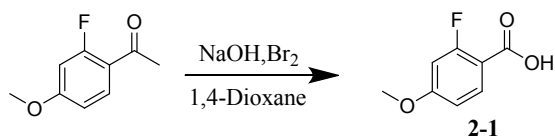

Into a 500 ml round bottom flask 2-fluoro-4-methoxyacetophenone (5 g, 29.8 mmol) were stirred and dissolved in 1,4-Dioxane. After dropping NaOH (3.57 g, 89.3 mmol) aqueous slowly and dropping Bromine (4.75 g, 29.8 mmol) under ice bath at room temperature. The reaction was extracted with water / DCM and water layer was acidified to pH = 3 with diluted HCl and the residue was washed by DI water to give white solid of **3-1**, yield 90 %.

$^1\text{H NMR}$  (300 MHz,  $\text{CDCl}_3$ )  $\delta$  (ppm) : 7.9 (d, 1H, Ar-H), 7.83-7.78 (dd,  $J = 7.5, 2.2$  Hz 1H, Ar-H), 7.02 (t,  $J = 6.1$  Hz 1H, Ar-H), 3.97 (s, 3H,  $-\text{OCH}_3$ ).

### Synthesis of 2-fluoro-4-hydroxybenzoic acid, 2-2

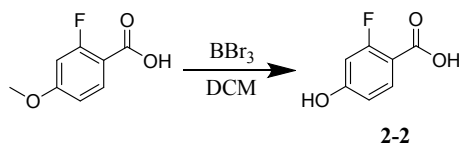

Into a 250 ml round bottom two-neck flask **2-1** (4.9 g, 28.8 mmol) were mixed in dry  $\text{CH}_2\text{Cl}_2$  (30 mL) under nitrogen and cooled to  $-78$  °C. Then  $\text{BBr}_3$  (14.4 g, 57.6 mmol) was injected to the previous solution slowly and the temperature of the reaction go to room temperature for 12 hrs. The reaction mixture was quenched with 2N NaOH until the solution became clear and the residue solvent was neutralized by HCl. The mixture was extracted with water / ethyl acetate and organic liquid layer was dried over anhydrous  $\text{MgSO}_4$ . Removal of the solvent by evaporation under reduced pressure to give white solid of **2-2**, yield 99 %.

$^1\text{H NMR}$  (300 MHz,  $\text{DMSO}-d_6$ )  $\delta$  (ppm) : 12.74 (s, 1H, Ar-COOH), 10.74 (s, 1H, Ar-OH), 7.62-7.58 (m, 1H, Ar-H), 7.01 (t,  $J = 8.4$  Hz 2H, Ar-H).

### Synthesis of methyl 2-fluoro-4-hydroxybenzoate, 2-3

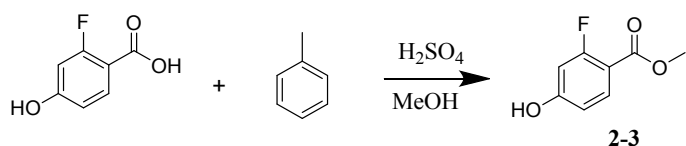

Into a 500 ml round bottom flask compound **2-2** (5 g, 32 mmol),  $\text{H}_2\text{SO}_4$  (7 ml) and MeOH (250 ml) were reflux at  $90$  °C. The reaction was removed the solvent by evaporation under reduced pressure and then extracted by water / ethyl acetate. The organic liquid layer was dried over anhydrous  $\text{MgSO}_4$ . The residue was purified by column chromatography (n-hexane / ethyl acetate) to give a white solid of **2-3**, yield 80 %.

$^1\text{H NMR}$  (300 MHz,  $\text{CDCl}_3$ )  $\delta$  (ppm) : 7.76 (d,  $J = 8.2$  Hz 1H, Ar-H), 7.74 (s, 1H, Ar-H), 7.06 (d,  $J = 8.1$  Hz 1H, Ar-H), 6.10 (s, 1H, Ar-OH), 3.91 (s, 3H,  $-\text{OCH}_3$ ).

### Synthesis of methyl 2-fluoro-4-(heptyloxy)benzoate, 2-4a

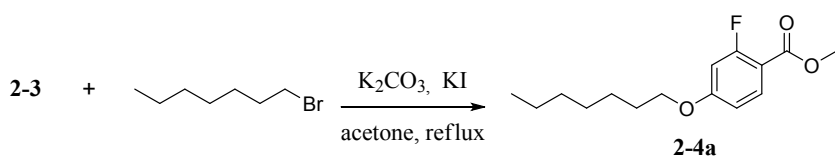

Into a 500 ml round bottom compound **2-3** (1.5 g, 8.8 mmol),  $K_2CO_3$  (2.36 g, 17.1 mmol) and potassium iodide (0.05 g) were stirred at reflux temperature in 200 ml of acetone and dropped 1-bromohexane (1.9 g, 10.6 mmol) slowly for overnight. After cooling to room temperature, the solvent was removed under reduced pressure. Then, the mixture was extracted with water / DCM and organic liquid layer was dried over anhydrous  $MgSO_4$ . After evaporation of the solvent under reduced pressure, the crude product was purified by column chromatography (n-hexane/ ethyl acetate) to give a white solid of **2-4a**, yield 75%.

$^1H$  NMR (300 MHz,  $CDCl_3$ )  $\delta$  (ppm) : 7.86 (t,  $J = 8.7$  Hz 1H, Ar-H), 6.69 (dd, 1H, Ar-H), 6.61 (dd, 1H, Ar-H), 3.97 (t,  $J = 6.3$  Hz 2H, -OCH<sub>2</sub>-), 3.87 (s, 3H, -OCH<sub>3</sub>), 1.77 (m, 2H, -CH<sub>2</sub>-), 1.45-1.20 (m, 8H, -CH<sub>2</sub>-), 0.87 (t,  $J = 6.3$  Hz 3H, -CH<sub>3</sub>).

#### Synthesis of 2-fluoro-4-(heptyloxy)benzoic acid, **2-5a**

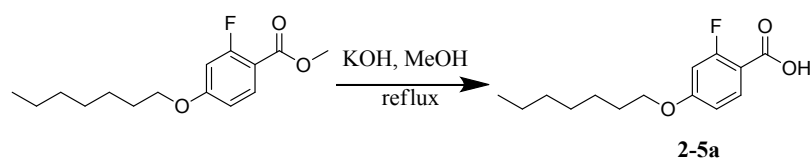

Into a 500 ml round bottom two-neck flask compound **2-4a** (2 g, 11.2 mmol) and KOH (3.0 g, 53.1 mmol) were stirred with MeOH under reflux at 90 °C. After removal of the solvent by evaporation under reduced pressure and the residue was acidified to pH= 3 to give white solid of **2-5a**, yield 85 %.

$^1H$  NMR (300 MHz,  $CDCl_3$ )  $\delta$  (ppm) : 11.02 (s, 1H, Ar-COOH), 8.01 (d,  $J = 8.4$  Hz 1H, Ar-H), 7.35 (d,  $J = 8.7$  Hz 1H, Ar-H), 6.92 (d,  $J = 9.0$  Hz 1H, Ar-H), 3.97 (t,  $J = 6.3$  Hz 2H, -OCH<sub>2</sub>-), 1.77 (m, 2H, -CH<sub>2</sub>-), 1.45-1.20 (m, 8H, -CH<sub>2</sub>-), 0.87 (t,  $J = 6.3$  Hz 3H, -CH<sub>3</sub>).

#### Synthesis of 4-((benzyloxy)carbonyl)phenyl 2-fluoro-4-(heptyloxy)benzoate, **2-6a**

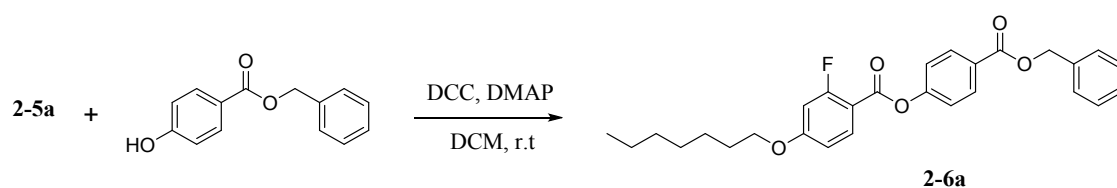

Into a 500 ml round bottom two-neck flask compound **2-5a** (2 g, 7.86 mmol), benzyl 4-hydroxybenzoate (2.1 g, 7.3 mmol), DMAP (0.04 g, 0.32 mmol) and DCC (3.68 g, 17.8 mmol) were mixed with DCM and the mixture was stirred at room temperature. The precipitated DCU was filtered off and washed with an excess of DCM (40 ml). The filtrate was extracted with water / DCM and organic liquid layer was dried over anhydrous  $MgSO_4$ , and removal of the solvent by evaporation under reduced pressure, the residue was purified by column chromatography (n-hexane / DCM) to give a light yellow solid of **2-6a**, yield 78 %.

$^1\text{H NMR}$  (300 MHz,  $\text{CDCl}_3$ )  $\delta$  (ppm) : 8.11 (d,  $J = 9.6$  Hz 2H, Ar-H), 8.01 (t,  $J = 8.4$  Hz 1H, Ar-H), 7.44-7.34 (m, 4H, Ar-H), 7.32-7.22 (m, 3H, Ar-H), 6.74 (dd, 1H, Ar-H), 6.65 (dd, 1H, Ar-H), 6.70 (dd, 2H, Ar-H), 5.35 (s, 1H,  $-\text{CH}_2\text{Ph}$ ), 4.01 (t,  $J = 6.0$  Hz 2H,  $-\text{OCH}_2-$ ), 1.77 (q, 2H,  $-\text{CH}_2-$ ), 1.50-1.31 (m, 8H,  $-\text{CH}_2-$ ), 1.02 (t,  $J = 6.0$  Hz 3H,  $-\text{CH}_3$ ).

#### Synthesis of 4-((2-fluoro-4-(heptyloxy)benzoyl)oxy)benzoic acid, **2-7a**

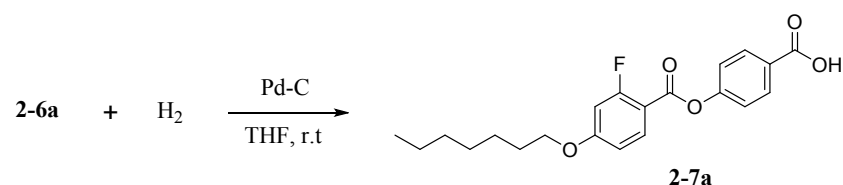

Into a 500 ml round bottom two-neck flask compound **2-6a** (2.8 g, 5.8 mmol) and 10 % Pd/C (0.1 g) catalyst were stirred in THF (150 ml) under hydrogen at room temperature for overnight. The catalyst was removed by filtration through Celite and washed with THF. The solvent was removed by evaporation under reduced pressure and the crude product recrystallized by THF / hexane to give light yellow solid of **2-7a**, yield 88 %. Anal. calcd for  $\text{C}_{21}\text{H}_{23}\text{FO}_5$ : C, 67.37, H, 6.19; found: C, 67.49, H, 6.10 %.

$^1\text{H NMR}$  (300 MHz,  $\text{CDCl}_3$ )  $\delta$  (ppm) : 11.01 (s, 1H, Ar-COOH), 8.17 (d,  $J = 9.6$  Hz 2H, Ar-H), 8.04 (t,  $J = 8.4$  Hz 1H, Ar-H), 7.33 (d,  $J = 8.7$  Hz 2H, Ar-H), 6.77 (dd, 1H, Ar-H), 6.68 (dd, 1H, Ar-H), 4.03 (t,  $J = 6.0$  Hz 2H,  $-\text{OCH}_2-$ ), 1.86 (t, 2H,  $-\text{CH}_2-$ ), 1.47-1.27 (m, 8H,  $-\text{CH}_2-$ ), 0.86 (t,  $J = 6.3$  Hz 3H,  $-\text{CH}_3$ )

#### Synthesis of (S)-methyl 2-fluoro-4-(octan-2-yloxy)benzoate, **2-4b**

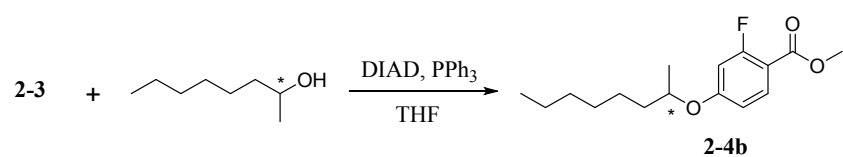

Into a 500 ml round bottom two-neck flask compound **2-3** (5 g, 29.4 mmol) and  $\text{PPh}_3$  (8.89 g, 33.8 mmol) were under vacuum for 1 hr and dry THF were injected under nitrogen. After 10 minutes, injecting (S)-(+)-2-octanol (4.6 g, 35.2 mmol) and the mixture were stirred for 15 minutes and injected DIAD (8.9 g, 44 mmol). Removal of the solvent by evaporation under reduced pressure, the residue was purified by column chromatography (n-hexane / DCM) to give a light yellow solid of **2-4b**, yield 85 %.

$^1\text{H NMR}$  (300 MHz,  $\text{CDCl}_3$ )  $\delta$  (ppm) : 7.92 (s, 1H, Ar-H), 7.25 (d,  $J = 8.7$  Hz 1H, Ar-H), 6.87 (d,  $J = 9.0$  Hz 1H, Ar-H), 4.30 (m, 1H,  $-\text{OCH}-$ ), 3.84 (s, 3H,  $-\text{OCH}_3$ ), 1.71 (m, 1H,  $-\text{CH}_2-$ ), 1.57 (m, 1H,  $-\text{CH}_2-$ ), 1.42-1.25 (m, 11H,  $-\text{CH}_2\text{CH}_3$ ), 0.83 (t,  $J = 6.3$  Hz 3H,  $-\text{CH}_3$ ).



### Synthesis of (S)-2-fluoro-4-(octan-2-yloxy)benzoic acid, 2-5b

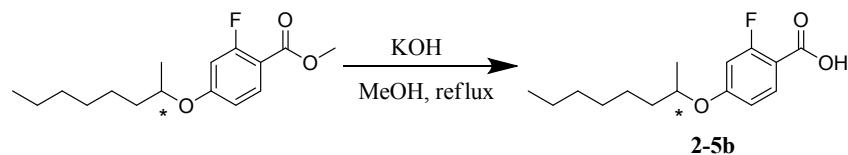

Into a 500 ml round bottom two-neck flask compound **2-4b** (5 g, 17.7 mmol) and KOH (3.0 g, 53.1 mmol) were stirred with MeOH under reflux at 90 °C. After removal of the solvent by evaporation under reduced pressure and the residue was acidified to pH = 3 to give light yellow solid of **2-5b**, yield 82 %.

<sup>1</sup>H NMR (300 MHz, CDCl<sub>3</sub>) δ (ppm) : 11.01 (s, 1H, Ar-COOH), 8.02 (d, *J* = 6.5 Hz 1H, Ar-H), 7.35 (d, *J* = 9.6 Hz 1H, Ar-H), 6.97 (d, *J* = 6.9 Hz 1H, Ar-H), 4.40 (s, 1H, -OCH-), 1.70 (m, 1H, -CH<sub>2</sub>-), 1.61 (m, 1H, -CH<sub>2</sub>-), 1.41-1.26 (m, 11H, -CH<sub>2</sub>CH<sub>3</sub>), 0.86 (t, *J* = 6.3 Hz 3H, -CH<sub>3</sub>).

### Synthesis of (S)-benzyl 4-((4-(octan-2-yloxy)benzoyl)oxy)benzoate, 2-6b

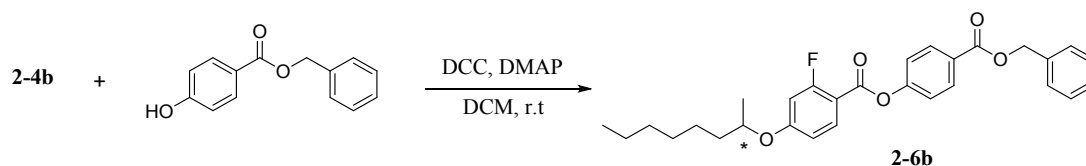

Into a 500 ml round bottom two-neck flask compound **2-5b** (1.0 g, 3.7 mmol), benzyl 4-hydroxybenzoate (0.8 g, 3.5 mmol), DMAP (0.02 g, 0.16 mmol) and DCC (1.5 g, 7.4 mmol) were mixed with DCM and the mixture was stirred at room temperature. The precipitated DCU was filtered off and washed with an excess of DCM (40 ml). The filtrate was extracted with water / DCM and organic liquid layer was dried over anhydrous MgSO<sub>4</sub>, and removal of the solvent by evaporation under reduced pressure, the residue was purified by column chromatography (n-hexane / DCM) to give a white solid of **2-6b**, yield 80 %.

<sup>1</sup>H NMR (300 MHz, CDCl<sub>3</sub>) δ (ppm) : 8.13 (d, *J* = 9.6 Hz 2H, Ar-H), 8.02 (t, *J* = 8.4 Hz 1H, Ar-H), 7.45-7.30 (m, 5H, Ar-H), 7.29-7.25 (m, 2H, Ar-H), 6.74 (dd, 1H, Ar-H), 6.66 (dd, 1H, Ar-H), 5.37 (s, 1H, -OCH<sub>2</sub>Ph), 4.40 (m, 1H, -OCH-), 1.70 (m, 1H, -CH<sub>2</sub>-), 1.61 (m, 1H, -CH<sub>2</sub>-), 1.41-1.26 (m, 11H, -CH<sub>2</sub>CH<sub>3</sub>), 0.86 (t, *J* = 6.3 Hz 3H, -CH<sub>3</sub>).

### Synthesis of (S)-4-((4-(octan-2-yloxy)benzoyl)oxy)benzoic acid, 2-7b

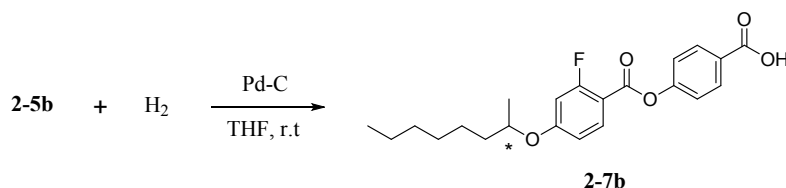

Into a 500 ml round bottom two-neck flask compound **2** (2.0 g, 4.3mmol) and 10 % Pd/C (0.2 g) catalyst were stirred in THF (200 ml) under hydrogen at room temperature for overnight. The catalyst was removed by filtration through Celite and washed with THF. The solvent was removed by evaporation under reduced pressure and the crude product recrystallized by THF / hexane to give light yellow solid of **2-7b**, yield 89 %.

<sup>1</sup>H NMR (300 MHz, CDCl<sub>3</sub>) δ (ppm) : 11.01 (s, 1H, Ar-COOH), 8.06 (d, 2H, Ar-H), 8.02 (t, *J* = 8.4 Hz 1H, Ar-H), 7.32 (m, 2H, Ar-H), 6.97 (dd, *J* = 9.0 Hz 1H, Ar-H), 6.74 (dd, *J* = 9.0 Hz 1H, Ar-H), 6.68 (dd, *J* = 9.0 Hz 1H, Ar-H), 4.43 (m, 1H, -OCH-), 1.70 (m, 1H, -CH<sub>2</sub>-), 1.61 (m, 1H, -CH<sub>2</sub>-), 1.41-1.26 (m, 11H, -CH<sub>2</sub>CH<sub>3</sub>), 0.86 (t, *J* = 6.3 Hz 3H, -CH<sub>3</sub>). Anal. calcd for C<sub>22</sub>H<sub>25</sub>FO<sub>5</sub>: C, 68.03, H, 6.49; found: C, 68.33, H, 6.41 %.

### Scheme S3

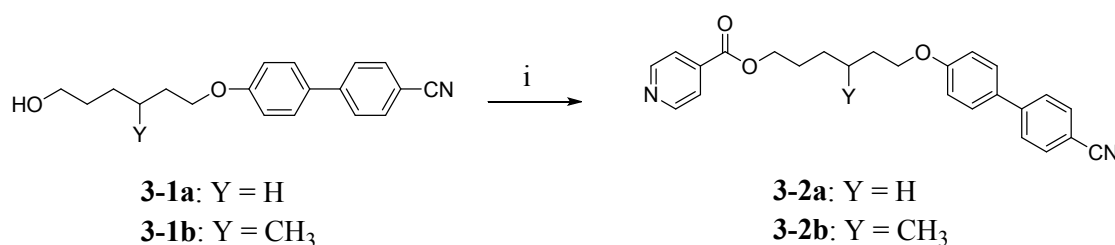

Reagents and conditions: (i) isonicotinoyl chloride hydrochloride, Et<sub>3</sub>N, DCM.

### Synthesis of 6-[(4-cyano-4'-biphenyl)oxy]hexanol (**3-1a**)

The synthetic procedure of compound **3-1a** has been reported in reference 33 (see supporting information Scheme S2).

### Synthesis of (S)-6-[(4-cyano-4'-biphenyl)oxy]-4-methylhexanol (**3-1b**)

The synthetic procedure of compound **3-1b** has been reported in reference 33 (see supporting information Scheme S2).

### Synthesis of 6-((4'-cyano-[1,1'-biphenyl]-4-yl)oxy)hexyl isonicotinate (**3-2a**)

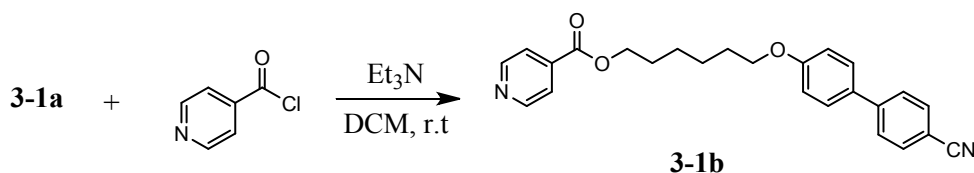

A mixture of **3-1a** (2g, 6.78 mmol), isonicotinoyl chloride hydrochloride (1.44 g, 8.15 mmol) and triethylamine (2.36 ml) was dissolved in dry dichloromethane (DCM) under nitrogen for 8 h at room temperature. After work up, the solvent was extracted with water/DCM and organic liquid layer was dried over anhydrous magnesium sulphate. After removal of the solvent by

evaporation under reduced pressure, the residue was purified by column chromatography and recrystallized from THF/hexane to afford compound **3-2a** as a white solid in 70% yield.

$^1\text{H NMR}$  (300 MHz,  $\text{CDCl}_3$ ):  $\delta$  (ppm) 8.96 (d,  $J=4.21\text{Hz}$ , 2H, Ar-H), 7.81 (d, 4.2Hz, 2H, Ar-H), 7.66 (q,  $J=8.9\text{Hz}$ , 4H, Ar-H), 7.41 (d,  $J=8.8\text{Hz}$ , 2H, Ar-H), 7.02 (d,  $J=8.9\text{Hz}$ , 2H, Ar-H), 4.43 (t,  $J=6.3\text{Hz}$ , 2H,  $-\text{OCH}_2$ ), 4.11 (t,  $J=6.4\text{Hz}$ , 2H,  $-\text{OCH}_2$ ), 1.82 (m, 4H,  $-\text{CH}_2$ ), 1.61 (m, 4H,  $-\text{CH}_2$ ). Anal. calcd for  $\text{C}_{25}\text{H}_{24}\text{N}_2\text{O}_3$ : C, 74.98, H, 6.04, N, 7.00; found: C, 74.97, H, 6.29, N, 7.01 %.

#### Synthesis of (S)-6-((4'-cyano-[1,1'-biphenyl]-4-yl)oxy)-4-methylhexyl isonicotinate (**3-2b**)

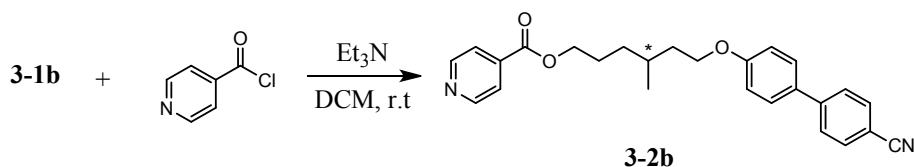

The similar manner was followed as that described above for the preparation of **3-1b**. Compound **3-2b** was obtained as a light yellow solid in 63% yield.

$^1\text{H NMR}$  (300 MHz,  $\text{CDCl}_3$ ):  $\delta$  (ppm) 8.77 (d,  $J=4.2\text{Hz}$ , 2H, Ar-H), 7.91 (m, 6H, Ar-H), 7.69 (d,  $J=8.8\text{Hz}$ , 2H, Ar-H), 7.02 (d,  $J=8.9\text{Hz}$ , 2H, Ar-H), 4.41 (t,  $J=6.3\text{Hz}$ , 2H,  $-\text{OCH}_2$ ), 4.01 (t,  $J=6.4\text{Hz}$ , 2H,  $-\text{OCH}_2$ ), 1.82-1.21 (m, 7H,  $-\text{CH}_2$ ), 1.13 (d,  $J=6.3\text{Hz}$ , 3H,  $-\text{CH}_3$ ). Anal. calcd for  $\text{C}_{26}\text{H}_{26}\text{N}_2\text{O}_3$ : C, 75.34, H, 6.32, N, 6.76; found: C, 75.09, H, 6.44, N, 6.69 %.

## XRD investigations

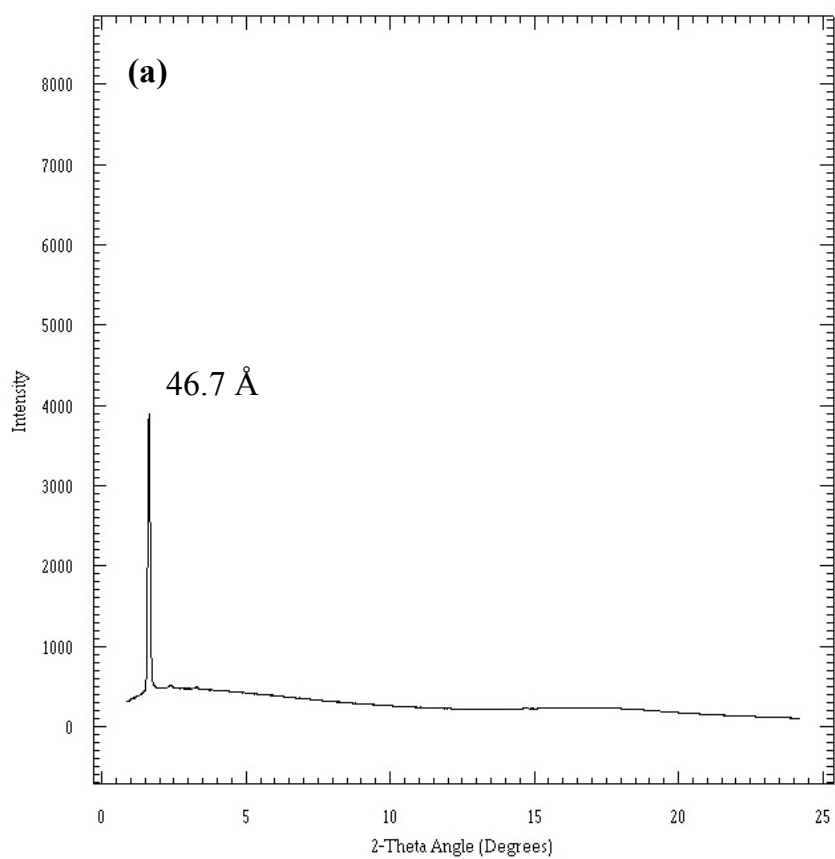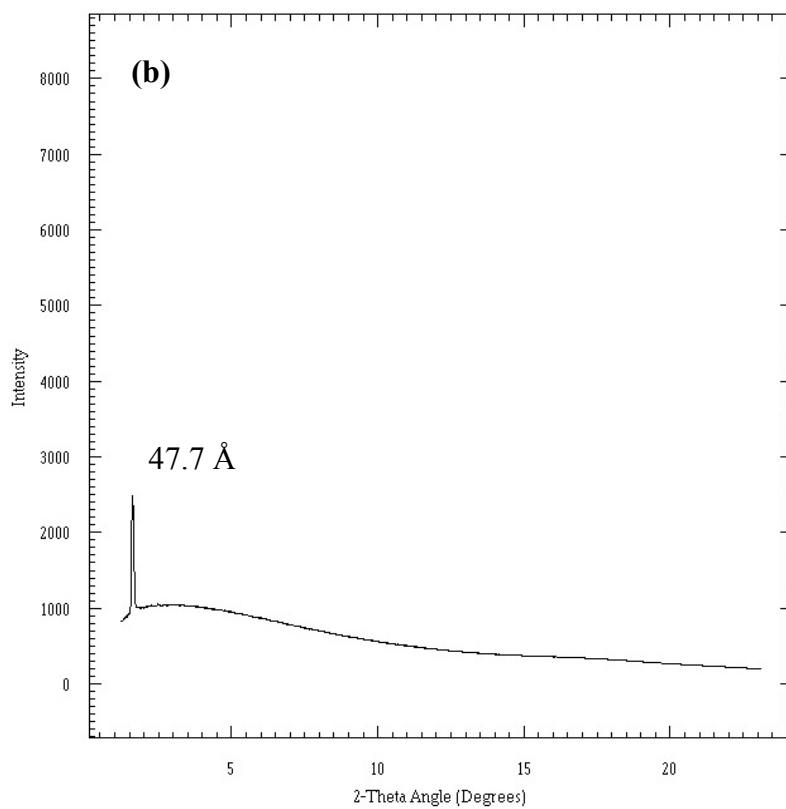

**Fig. S1** Powder XRD Analyses of complexes (a) **AF\*/P** (1:1 mol.) at 50.2 °C, (b) **A\*/P\*** (1:1 mol.) at 52.1 °C.

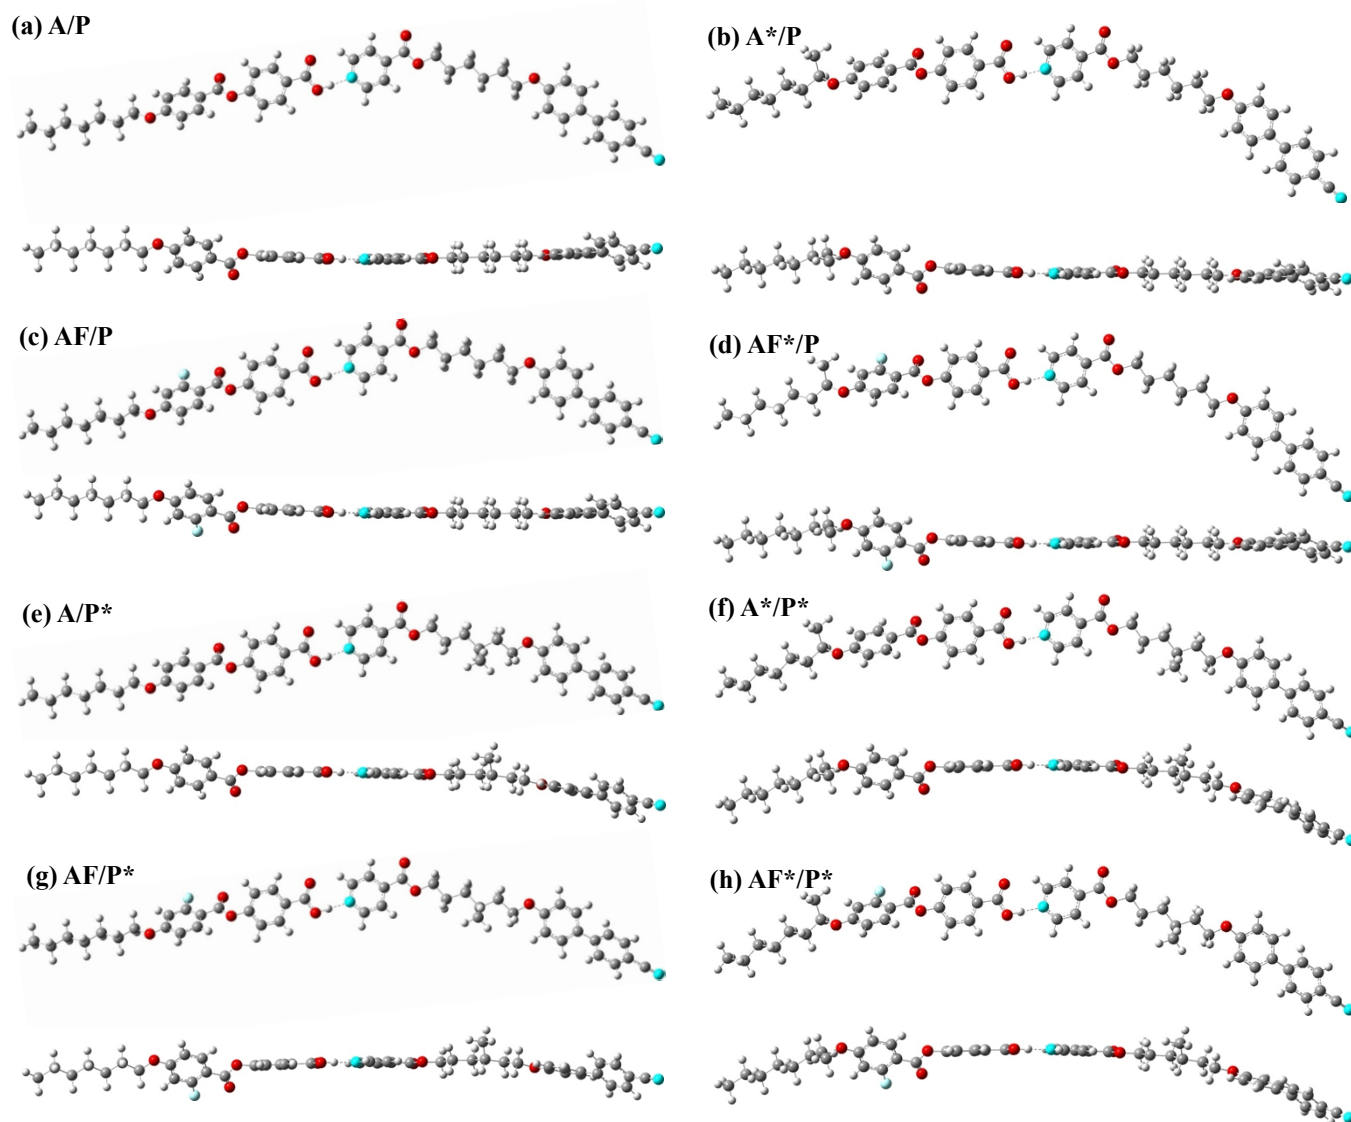

**Fig. S2** Molecular models of the lowest energy conformations of complexes **D/P** and **D/P\*** (where **D** = A, A\*, AF and AF\*). At molar ratio of H-acceptors and H-donors is 1:1.

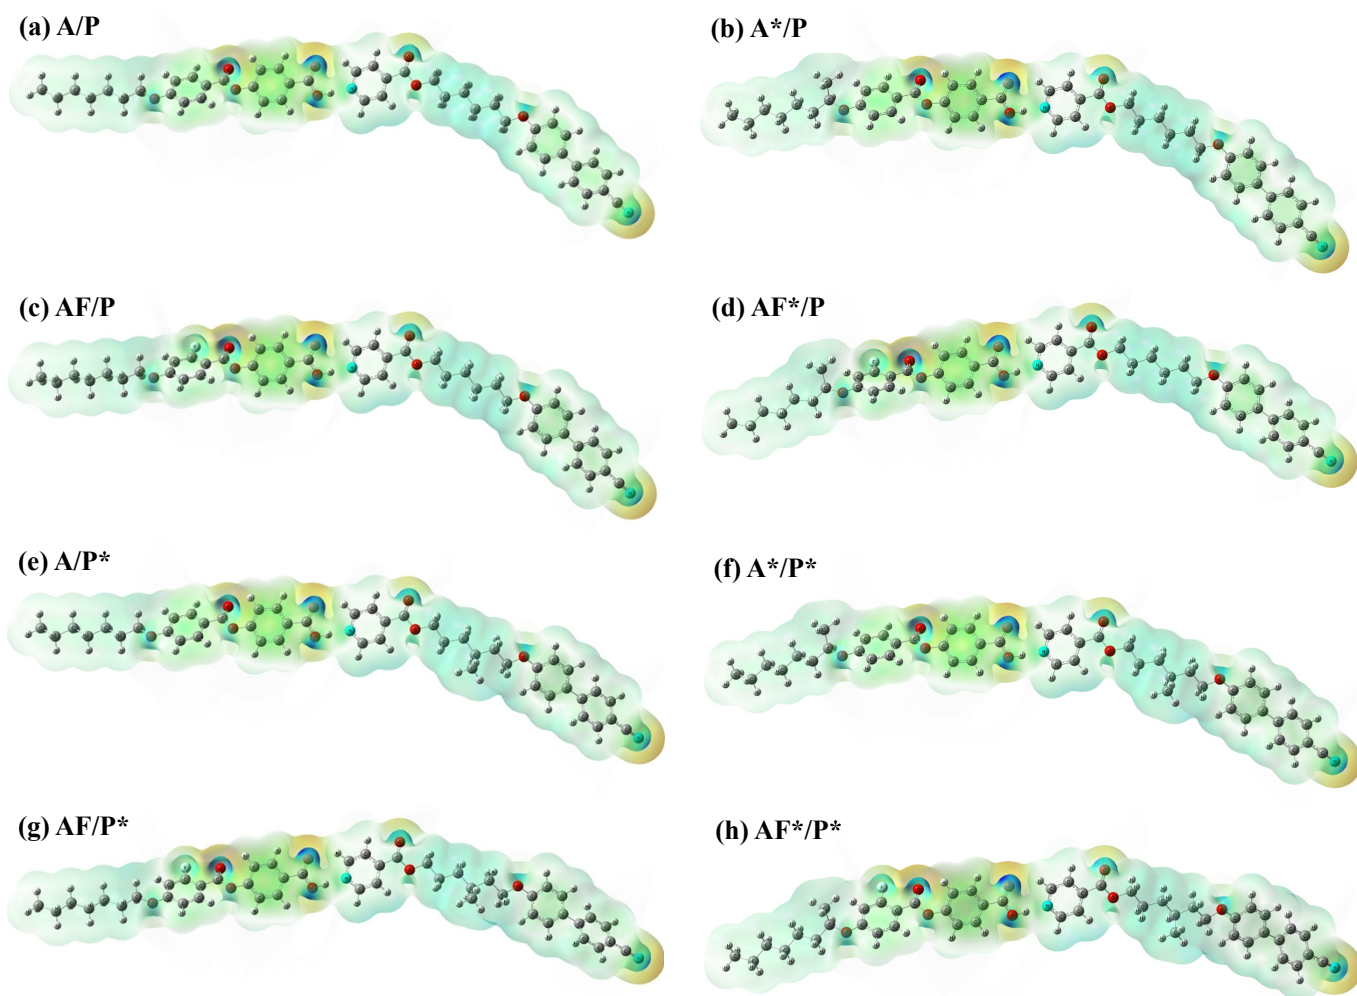

**Fig. S3** Molecular electrostatic potential mapped on the electron density of the lowest energy structure for complexes **D/P** and **D/P\*** (where **D** = **A**, **A\***, **AF** and **AF\***). At molar ratio of H-acceptors and H-donors is 1:1.

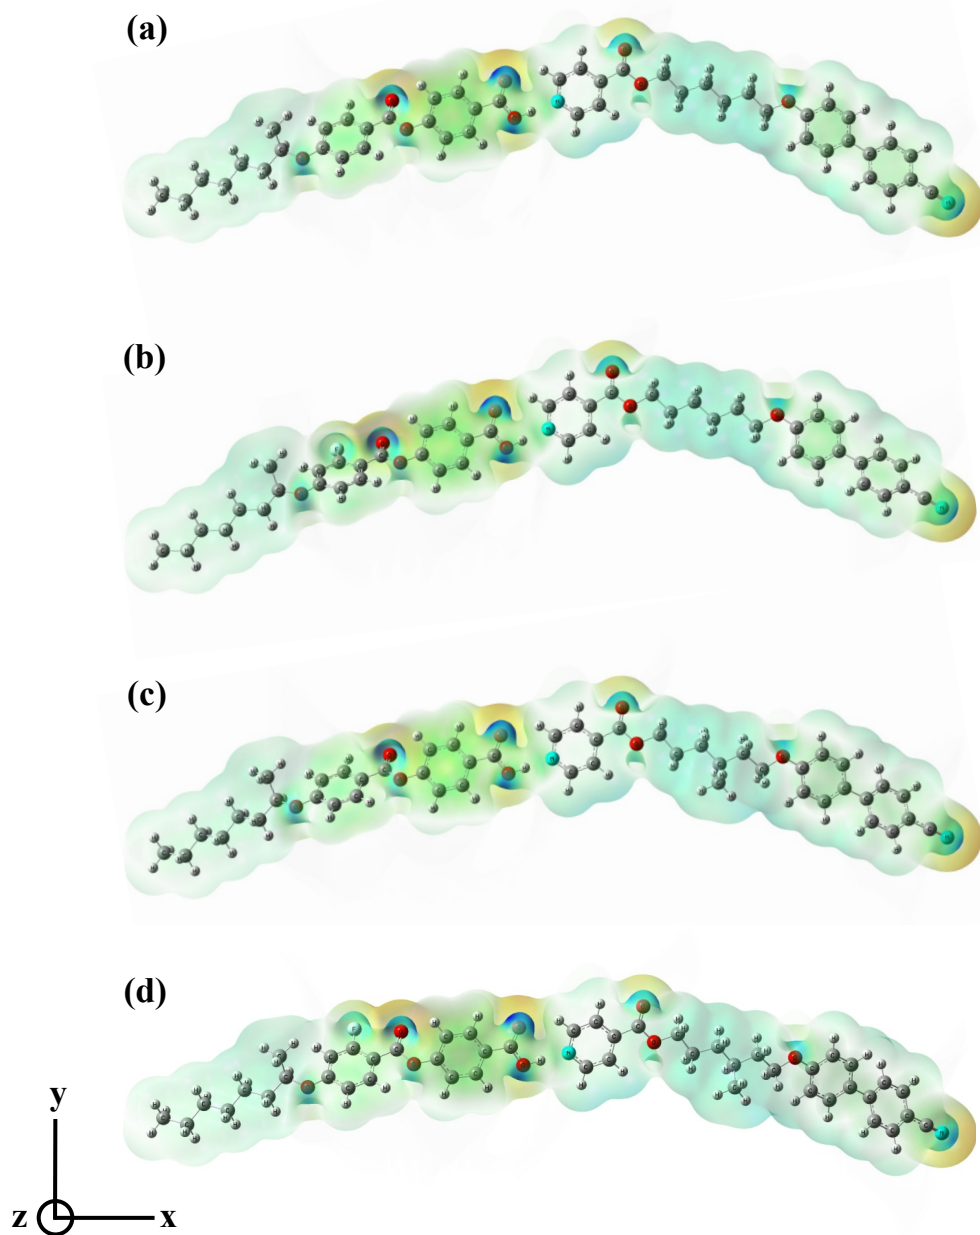

**Fig. S4** Molecular electrostatic potential mapped on the electron density of the lowest energy diad liquid crystal structures: (a)  $A^*/P$  (1:1 mol.), (b)  $AF^*/P$  (1:1 mol.), (c)  $A^*/P^*$  (1:1 mol.) and (d)  $AF^*/P^*$  (1:1 mol.). The electron density was visualized continuously increases from red (electron-rich) > orange > yellow > green > blue (electron-poor).

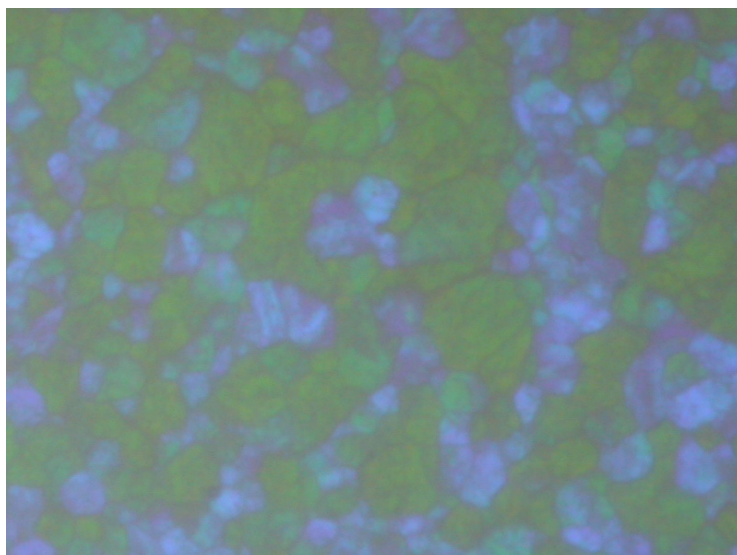

**Fig. S5** An expanded POM texture shows the phase transition process of the asymmetric H-bonded dimeric complex **A\*/P** (3:1 mol.). On cooling rate  $0.5\text{ }^{\circ}\text{Cmin}^{-1}$ . The blue phase I (platelet textures with different colors and fine stripes) at  $102.8^{\circ}\text{C}$ .



**Table S1** XRD data of complexes **A/P**, **A\*/P**, **AF/P**, **AF\*/P**, **A/P\***, **A\*/P\*** and **AF/P\*** (1:1 mol.)

| Complex      | Cooling temp. (°C) | Mesophase | d-spacing (Å) | Miller index (a b c) | Molecular length L(Å) |
|--------------|--------------------|-----------|---------------|----------------------|-----------------------|
| <b>A/P</b>   | 110.1              | SmA       | 48.1          | (001)                | 47.4                  |
| <b>A*/P</b>  | 88.3               | SmA       | 47.5          | (001)                | 46.7                  |
| <b>AF/P</b>  | 87.4               | SmA       | 47.8          | (001)                | 47.4                  |
| <b>AF*/P</b> | 55.6               | SmA       | 46.7          | (001)                | 46.7                  |
| <b>A/P*</b>  | 91.2               | SmA       | 48.5          | (001)                | 48.1                  |
| <b>A*/P*</b> | 52.1               | SmA       | 47.7          | (001)                | 46.5                  |
| <b>AF/P*</b> | 70.0               | SmA       | 49.1          | (001)                | 48.0                  |

**Theoretical simulation**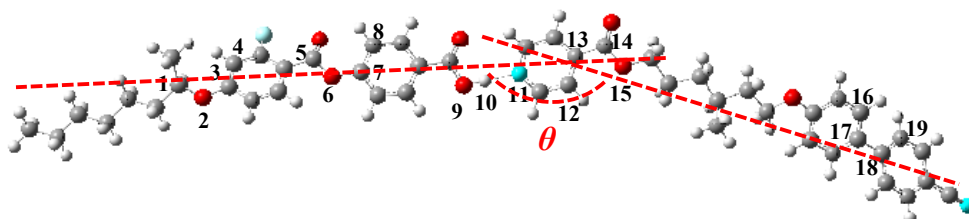**Table S2** Parameters of length, breadth, biaxiality, bend angle and dihedral angle for complexes **D/P** and **D/P\*** (where **D** = **A**, **A\***, **AF** and **AF\***) with 1:1 molar ratio of H-acceptors and H-donors

| Complex                  | Hydrogen bond length | Length | Breadth | Breadth | Biaxial parameter | Bent angle | Dihedral angle   |                  |                 |                      |                      | HTP ( $\mu\text{m}^{-1}$ ) |
|--------------------------|----------------------|--------|---------|---------|-------------------|------------|------------------|------------------|-----------------|----------------------|----------------------|----------------------------|
|                          | L (Å)                | L (Å)  | W1 (Å)  | W2 (Å)  | W1/W2             | (deg)      | 1, 2, 3, 4 (deg) | 5, 6, 7, 8 (deg) | 9, 10, 11 (deg) | 12, 13, 14, 15 (deg) | 16, 17, 18, 19 (deg) |                            |
| <b>A/P</b>               | 1.7                  | 47.4   | 9.0     | 3.9     | 2.31              | 156.7      | -0.2             | 43.3             | 178.7           | 0.0                  | -32.2                |                            |
| <b>A*/P</b>              | 1.7                  | 46.7   | 9.5     | 4.9     | 1.94              | 152.9      | -3.1             | 44.9             | 178.3           | 1.0                  | -32.3                | 2.56                       |
| <b>AF/P</b>              | 1.7                  | 47.4   | 8.9     | 5.6     | 1.59              | 156.7      | -0.3             | 45.2             | 179.0           | 0.0                  | -32.1                |                            |
| <b>AF*/P</b>             | 1.7                  | 46.7   | 9.6     | 4.9     | 1.96              | 150.6      | -3.1             | 45.7             | 178.5           | 0.9                  | -32.1                | 2.50                       |
| <b>A/P*</b>              | 1.7                  | 48.1   | 7.8     | 5.9     | 1.32              | 162.0      | -0.1             | 45.5             | 179.3           | -0.5                 | -32.4                | 2.44                       |
| <b>A*/P*</b>             | 1.7                  | 46.5   | 9.3     | 6.0     | 1.55              | 152.5      | -1.4             | 44.8             | 178.8           | 2.0                  | -32.1                | 2.78                       |
| <b>AF/P*</b>             | 1.7                  | 48.0   | 8.0     | 5.9     | 1.36              | 160.8      | -0.1             | 46.1             | 179.0           | -1.0                 | -32.4                |                            |
| <b>AF*/P*</b>            | 1.7                  | 46.4   | 9.4     | 6.2     | 1.52              | 149.9      | -1.3             | 46.6             | 178.5           | 1.2                  | -32.2                | 2.94                       |
| <b>A*-P<sup>a</sup></b>  |                      | 41.9   | 13.2    | 5.8     | 2.28              | 126.5      |                  |                  |                 |                      |                      | 3.05                       |
| <b>A-P<sup>a</sup></b>   |                      | 45.0   | 10.8    | 6.4     | 1.69              | 141.1      |                  |                  |                 |                      |                      | 2.97                       |
| <b>A*-P<sup>a</sup>*</b> |                      | 43.2   | 12.1    | 6.5     | 1.86              | 132.1      |                  |                  |                 |                      |                      | 3.22                       |

<sup>a</sup> The analogous covalent diads (see reference 32 in main text).

**Table S3** Dipole moments of complexes **D/P** and **D/P\*** (where **D** = **A**, **A\***, **AF** and **AF\***) with 1:1 molar ratio of H-acceptors and H-donors

| Complex                  | X     | Y   | Z    | Total (Debye) |
|--------------------------|-------|-----|------|---------------|
| <b>A/P</b>               | -5.7  | 0.6 | -0.6 | 5.8           |
| <b>A*/P</b>              | 5.9   | 0.3 | 1.0  | 6.0           |
| <b>AF/P</b>              | -6.0  | 1.5 | -1.3 | 6.4           |
| <b>AF*/P</b>             | -6.2  | 1.2 | -1.8 | 6.6           |
| <b>A/P*</b>              | 6.2   | 1.0 | 1.8  | 6.5           |
| <b>A*/P*</b>             | 6.1   | 0.2 | 2.7  | 6.7           |
| <b>AF/P*</b>             | -6.5  | 1.7 | -2.5 | 7.2           |
| <b>AF*/P*</b>            | -6.5  | 0.7 | -3.5 | 7.4           |
| <b>A*-P<sup>a</sup></b>  | -12.0 | 1.0 | -2.2 | 12.3          |
| <b>A-P<sup>a</sup></b>   | -12.6 | 1.7 | -3.0 | 13.1          |
| <b>A*-P<sup>a</sup>*</b> | 12.7  | 1.6 | 3.1  | 13.2          |

<sup>a</sup> The analogous covalent diads (see reference 33).

**Table S4** Phase transition temperatures (°C) and enthalpies (J/g) of complexes **D/P** and **D/P\*** (where **D** = **A**, **A\***, **AF** and **AF\***) with various molar ratios of H-acceptors and H-donors upon heating

| Complex       | Molar ratio<br>(H-donor vs. H-acceptor) | Phase transition temperatures (°C) [Enthalpies (J/g)] |
|---------------|-----------------------------------------|-------------------------------------------------------|
| <b>A*/P</b>   | 1 : 1                                   | Cr 107.4 [1.21] SmA 134.8 [3.59] N* 152.9 [0.37] Iso  |
|               | 2 : 1                                   | Cr 102.3 [1.05] SmA 124.9 [4.31] N* 134.2 [0.59] Iso  |
|               | 3 : 1                                   | Cr 89.5 [2.31] SmA 97.4 [4.61] N* 109.6 [1.01] Iso    |
|               | 4 : 1                                   | Cr 124.7 [3.32] N* 153.0 [4.40] Iso                   |
| <b>A*/P*</b>  | 1 : 1                                   | Cr 85.3 [2.97] SmA 92.7 [3.39] N* 120.7 [0.47] Iso    |
|               | 2 : 1                                   | Cr 87.5 [3.42] SmA 95.6 [2.90] N* 125.1 [0.45] Iso    |
|               | 3 : 1                                   | Cr 90.1 [2.40] SmA 125.2 [5.51] N* 132.4 [0.73] Iso   |
|               | 4 : 1                                   | Cr 91.5 [1.32] N* 143.0 [3.12] Iso                    |
| <b>AF*/P</b>  | 1 : 1                                   | Cr 85.1 [0.97] SmA 89.4 [0.33] N* 105.7 [0.56] Iso    |
|               | 2 : 1                                   | Cr 88.4 [0.45] SmA 91.2 [0.41] N* 107.6 [0.65] Iso    |
|               | 3 : 1                                   | Cr 91.1 [0.69] SmA 106.5 [0.54] N* 122.7 [0.80] Iso   |
|               | 4 : 1                                   | Cr 95.6 [0.62] N* 130.9 [0.81] Iso                    |
| <b>AF*/P*</b> | 1 : 1                                   | Cr 63.1 [1.40] N* 84.4 [0.54] Iso                     |
|               | 2 : 1                                   | Cr 75.6 [0.90] N* 109.8 [0.71] Iso                    |
|               | 3 : 1                                   | Cr 81.3 [1.10] N* 117.1 [0.55] Iso                    |
|               | 4 : 1                                   | Cr 84.1 [1.01] N* 116.0 [0.75] Iso                    |
| <b>A/P</b>    | 1 : 1                                   | Cr 121.7 [3.14] SmA 149.8 [3.11] N 190.1 [4.87] Iso   |
| <b>AF/P</b>   | 1 : 1                                   | Cr 110.8 [3.55] SmA 152.3 [4.73] N 173.5 [2.41] Iso   |
| <b>A/P*</b>   | 1 : 1                                   | Cr 118.4 [3.18] SmA 160.1 [4.21] N* 179.2 [3.90] Iso  |
| <b>AF/P*</b>  | 1 : 1                                   | Cr 102.3 [3.22] SmA 131.5 [3.60] N* 158.8 [4.45] Iso  |

**Table S5** Phase transition temperatures (°C) and enthalpies (J/g) of pure components **P**, **P\***, **A**, **A\***, **AF** and **AF\***

| Compound   | Phase transition temperatures (°C) [Enthalpies (J/g)]                        |
|------------|------------------------------------------------------------------------------|
| <b>P</b>   | Cr 99.3 [14.68] Iso<br>Iso 67.3 [15.27] Cr                                   |
| <b>P*</b>  | Cr 76.1 [0.52] Iso<br>Iso -5.0 [0.60] Cr                                     |
| <b>A</b>   | Cr 168.1 [6.34] N 227.0 [5.36] Iso<br>Iso 226.0 [5.31] N 160.9 [5.38] Cr     |
| <b>A*</b>  | Cr 118.3 [5.43] N* 163.9 [6.53] Iso<br>Iso 162.4 [4.81] N 115.9 [4.89] Cr    |
| <b>AF</b>  | Cr 128.3 [11.66] N 218.9 [5.06] Iso<br>Iso 220.9 [4.81] N 105.47 [11.41] Cr  |
| <b>AF*</b> | Cr 106.5 [12.26] N* 147.0 [7.51] Iso<br>Iso 144.0 [3.22] N* 104.3 [16.46] Cr |
